# Supplementary material
Source: Springer Nature journal article supplement (https://www.springermedizin.de/resource/supplementary/13058_2011_3029_MOESM10_ESM.pdf/9702904)

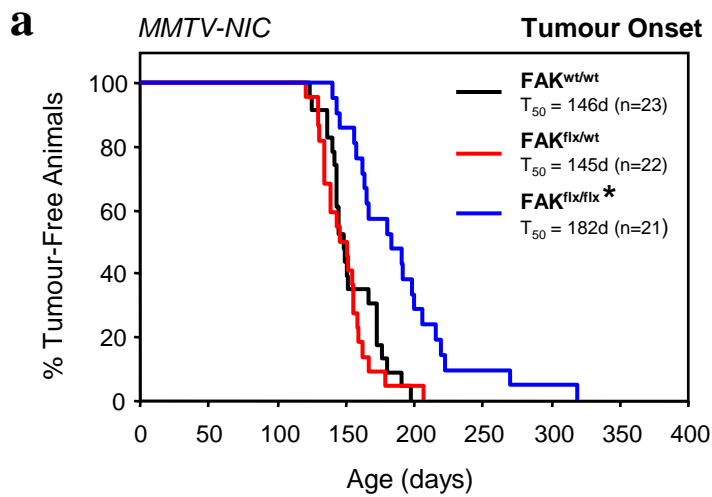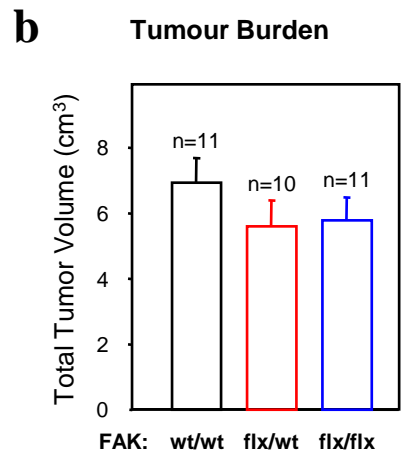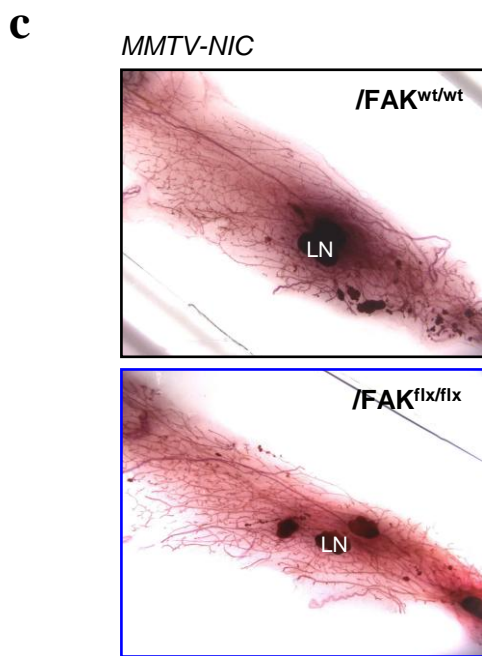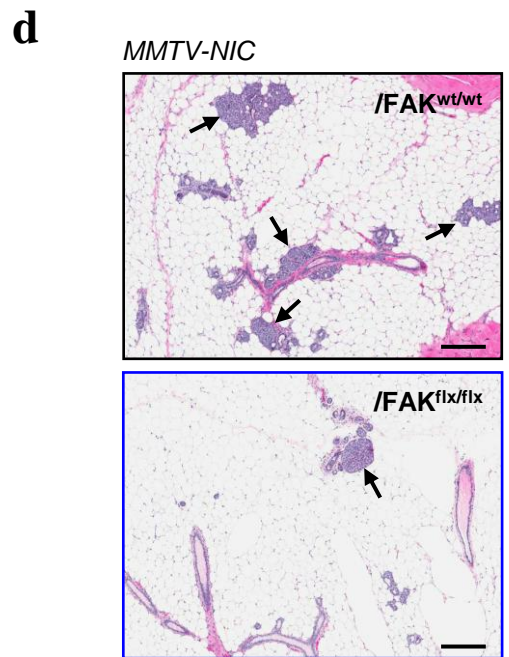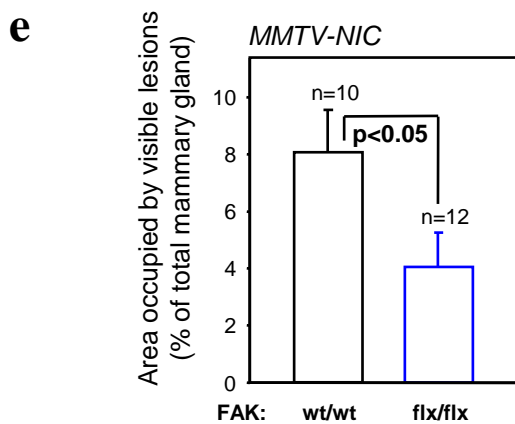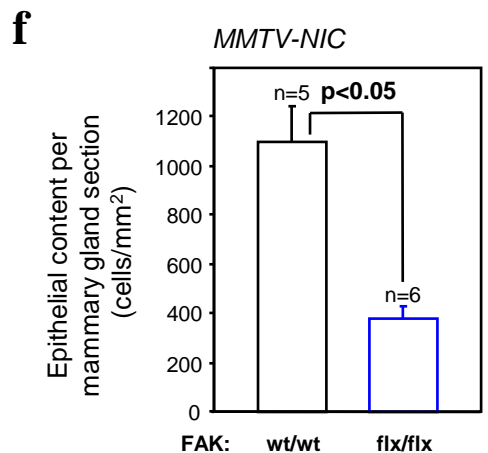

Supplement: MOESM10 [file 9702904]
